Tempo, mode, and fitness effects of mutation in *Caenorhabditis elegans* over 400 generations  
of minimal selection

Ayush Shekhar Saxena<sup>1</sup>, Matthew P. Salomon<sup>1,2</sup>, Chikako Matsuba<sup>1,2</sup>, Shu-Dan Yeh<sup>1,3</sup> and  
Charles F. Baer<sup>1,4</sup>

1 – Department of Biology, University of Florida, Gainesville, FL, USA

2 – Department of Molecular Oncology, John Wayne Cancer Institute, Santa Monica, CA, USA

3 - Department of Life Sciences, National Central University, Taiwan

4 – University of Florida Genetics Institute

Correspondence to:

Charles F. Baer

Dept. of Biology

621 Bartram Hall

876 Newell Dr.

University of Florida

Gainesville, FL 32611-8525 USA

[cbaer@ufl.edu](mailto:cbaer@ufl.edu)

352-392-3550

Running Title: Evolution of mutation in *C. elegans*

Keywords: Drift barrier, Mutability, Mutation accumulation, Short tandem repeat, Synergistic  
epistasis

## Abstract

The mutational process varies at many levels, from within genomes to among taxa. Many mechanisms have been linked to variation in mutation, but understanding of the evolution of the mutational process is rudimentary. Physiological condition is often implicated as a source of variation in microbial mutation rate and may contribute to mutation rate variation in multicellular organisms.

Deleterious mutations are a ubiquitous source of variation in condition. We test the hypothesis that the mutational process depends on the underlying mutation load in two groups of *Caenorhabditis elegans* mutation accumulation (MA) lines that differ in their starting mutation loads. "First-Order MA" (O1MA) lines maintained under minimal selection for ~250 generations were divided into high-fitness and low-fitness groups and sets of "second-order MA" (O2MA) lines derived from each O1MA line were maintained for ~150 additional generations. Genomes of 48 O2MA lines and their O1MA progenitors were sequenced. There is significant variation among O2MA lines in base-substitution rate ( $\mu_{bs}$ ), but no effect of initial fitness, whereas the indel rate is greater in high-fitness O2MA lines. Overall,  $\mu_{bs}$  is positively correlated with recombination and proximity to short tandem repeats and negatively correlated with 1 Kb GC content. However, multiple logistic regression shows mutability is sufficiently predicted by the three-nucleotide motif. ~90% of the variance in standing nucleotide variation is explained by mutability. Total mutation rate increased in the O2MA lines, as predicted by the "drift barrier" model of mutation rate evolution. These data, combined with experimental estimates of fitness, suggest that epistasis is synergistic.

## Introduction

The evolution of the mutation rate is of longstanding interest to evolutionary theorists (Fisher 1930; Sturtevant 1937; Lynch et al. 2016), and there is abundant empirical evidence that the overall rate, molecular spectrum, and phenotypic consequences of mutation - collectively, the mutational process - vary at many biological levels, from within an individual genome to among species and higher taxa (Drake et al. 1998; Conrad et al. 2011; Schrider et al. 2013; Long et al. 2016; Ness et al. 2016). However, perhaps with the exception of the eubacterium *E. coli* (e.g., Cairns and Foster 1991; Matic et al. 1997; Foster 1999; Denamur et al. 2002; Bjedov et al. 2003; Denamur and Matic 2006; Turrientes et al. 2013), variation in the mutational process has not been systematically investigated in any organism.

A characterization of mutation rate variation with predictive power requires knowledge of (among other things), (1) how much genetic variation for the mutational process is present in a typical population or species? (2) how much genetic variation for the mutational process is introduced into a population by mutation itself? (3) what are the relative contributions of genes and environment to variation in the mutational process? and (4) to what extent is the evolution of the mutational process influenced by natural selection, relative to the inevitable influences of drift and mutation itself?

Microbiologists have appreciated for many decades that physiological stress is often associated with increased mutation rate (e.g., see Figure 6 of Ogur et al. 1960). Recently, Agrawal and his colleagues have undertaken a systematic investigation into the effects of physiological condition (~ "stress") on the mutational process in *Drosophila melanogaster*, motivated by theoretical findings that if the mutation rate is condition-dependent, the accumulation of deleterious mutations can have interesting and sometimes counterintuitive feedback effects on population mean fitness (Agrawal 2002; Shaw and Baer 2011). They manipulated physiological condition both exogenously, by manipulating food quality (Agrawal and Wang 2008) and endogenously, by allowing mutations to accumulate under relaxed

selection on genomes that were initially identical except for the presence or absence of one or two mutations of large deleterious effect (Sharp and Agrawal 2012). Poorly-fed females transmitted ~30% more lethal mutations than did well-fed females (Agrawal and Wang 2008). Similarly, mutation accumulation (MA) lines beginning with a large genetic load declined in fitness more rapidly than lines with wild-type genomes, which is most simply explained by the low-fitness lines having a greater mutation rate than the high-fitness lines (Sharp and Agrawal 2012). Whole-genome sequencing of the MA lines revealed that the faster decline in fitness in the loaded lines can be attributed to an elevated rate of small deletions (Sharp and Agrawal 2016). In an analogous study, Ávila et al. (2006) constructed a set of MA lines of *D. melanogaster* derived from a single MA line that had itself accumulated mutations under relaxed selection for 265 generations, a protocol that we call "second-order MA" (O2MA). The per-generation decline in fitness was greater in the second-order MA lines than in the ancestral ("first-order MA", O1MA) lines. That result is consistent with an increased mutation rate in the O2MA lines relative to the O1MA lines, but it is also consistent with mutational effects being greater in the second-order MA lines (i.e., synergistic epistasis; Dickinson 2008).

We report here the results of a second-order MA experiment in the nematode *C. elegans*, specifically designed to assess the relationship between the initial genomic load of spontaneous deleterious mutations and the subsequent effects on the mutational process (Figure 1). Initially, a set of 100 MA lines derived from a single, highly inbred individual of the N2 strain was allowed to accumulate mutations for approximately 250 generations under minimal selection. From a subset of 67 O1MA lines assayed for fitness, we chose five lines with consistently high absolute fitness and five lines with consistently low absolute fitness, from which we established ten independent sets of 48 O2MA lines, referred to as "O2MA families", which were allowed to accumulate mutations for an additional ~150 generations (Matsuba et al. 2012). Upon completion of the second-order MA phase, five replicate O2MA lines derived from

each of the ten O2MA families were sequenced at ~25X average coverage, along with nine of the ten O1MA progenitors.

The resulting data allow us to address several fundamental questions about the evolution of the mutational process. First, does initial fitness affect the mutational process, and if so, how? Second, how fast does genetic variation in the mutational process accumulate due to the effects of new spontaneous mutations? Third, how does the mutational process depend on underlying features of the genome, e.g., local recombination rate or base composition? Fourth, to what extent does the local mutational milieu predict standing nucleotide sequence variation?

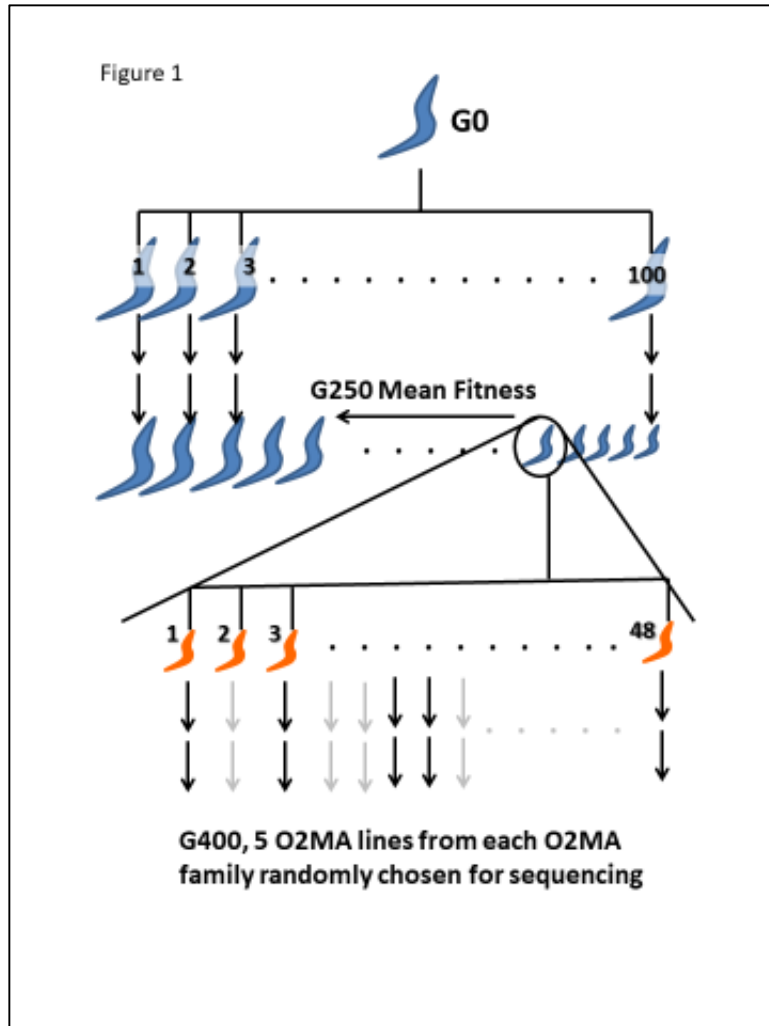

**Figure 1.** Schematic depiction of the second-order MA (O2MA) experiment. Of the 100 O1MA lines (blue worms), after ~250 generations, five low-fitness O1MA lines and five high-fitness O1MA lines were chosen as progenitors for sets of 48 O2MA lines (orange worms). Relative fitness of O1MA lines is represented by the size of the worm, with relative fitness increasing with size. Each set of 48 O2MA lines derived from an O1MA line is an "O2MA family". The 48 O2MA lines derived from the circled O1MA line constitute one O2MA family. After ~150 additional generations (G400), five O2MA lines (black arrows) were randomly chosen from each O2MA family for sequencing.

## Results

Pooled over 48 (out of 50) O2MA lines and nine of the ten O1MA ancestors, using our default pipeline we identified 1828 base substitutions (1481 O2MA, 347 O1MA), 361 small deletions (293 O2 MA, 68 O1MA) and 236 small insertions (196 O2MA, 40 O1MA). We sequenced the genomes of an additional 23 O1MA lines not included in the O2MA experiment, from which we identified 884 base substitutions, 142 deletions, and 93 insertions. Mutation rates for the different groups are summarized in Table 1, and given for individual lines in Supplementary Table S1. Individual mutations and their properties are listed in Supplementary Table S2. Raw sequence data are archived in the NCBI Short Read Archive, project numbers PRJNA395568 (O2MA lines and O1MA ancestors) and PRJNA429972 (other O1MA lines).

Averaged over all 32 O1MA lines, the per-nucleotide base-substitution mutation rate  $\mu_{bs}$  =  $2.33 (\pm 0.08) \times 10^{-9}$  per generation.  $\mu_{bs}$  for the nine O1MA ancestors is  $2.26 \pm 0.12 \times 10^{-9}$  per generation). Averaged over the 48 O2MA lines, the base-substitution mutation rate over the subsequent ~150 generations is estimated to be  $\mu_{bs} = 2.57 (\pm 0.11) \times 10^{-9}$  per-generation, not significantly different from the combined O1MA rate (general linear model,  $F_{1,14.5} = 1.32$ ,  $p < 0.26$ ; see Supplementary Appendix A1.6 for details of the GLM). The short indel rate for the full set of 32 O1MA lines  $\mu_{INDEL} = 0.66 (\pm 0.04) \times 10^{-9}$  per-site per-generation. The indel rate of the nine O1MA ancestors ( $\mu_{INDEL,ANC} = 0.68 \pm 0.06 \times 10^{-9}$ /generation) does not differ from that of the other 21 O1MA lines ( $\mu_{INDEL,OTHER} = 0.64 \pm 0.05 \times 10^{-9}$ /generation. Averaged over all 48 O2MA lines,  $\mu_{INDEL} = 0.84 \pm 0.05 \times 10^{-9}$ /generation, significantly greater than the combined O1MA rate (GLM,  $F_{1,24.2} = 8.27$ ,  $p < 0.01$ ) but not significantly greater than that of the nine O1MA ancestors (GLM,  $F_{1,45.4} = 1.61$ ,  $p > 0.21$ ).

*The base-substitution mutation rate is not fitness-dependent.*

There is significantly more variation in  $\mu_{bs}$  among O2MA lines than expected if the base-substitution mutation rate is uniform across the full set of 48 O2MA lines (simulation  $P < 0.0001$ ; Supplementary Figure S1). Moreover, there is significant variation in  $\mu_{bs}$  among O2MA families

(LRT, chi-square = 9.27, df=1,  $P < 0.003$ ; Figure 2). Similarly, there is more variation among O1MA lines than predicted by a uniform mutation rate (simulation  $P < 0.015$ ). The simplest interpretation is that some element(s) of the mutational process diverged over the course of the first ~250 generations of MA, and that the signal of the difference(s) carried through the next ~150 generations of O2MA.

However, there is no evidence that  $\mu_{bs}$  differs consistently between the O2MA families derived from high fitness and low fitness O1MA ancestors (GLM,  $F_{1,6.24} = 0.18$ ,  $p > 0.75$ ); Averaged over the five O2MA families in each fitness class, the base substitution mutation rate between G250 and G400 for High and Low fitness lines is estimated to be  $\mu_{bs,HIGH} = 2.58 (\pm 0.11) \times 10^{-9}$  / gen, and  $\mu_{bs,LOW} = 2.49 (\pm 0.32) \times 10^{-9}$  / gen (Figure 2).

As expected from the lack of differentiation of  $\mu_{bs}$ , the base-substitution spectrum does not differ significantly between the high-fitness and low-fitness O2MA lines (Supplementary Figure S2; Monte Carlo Fisher's Exact Test,  $10^7$  replicates,  $P > 0.70$ ), nor does it vary between O2MA families (MC FET,  $P > 0.25$ ), between individual O2MA lines (MC FET,  $P > 0.08$ ), between O2MA lines within any of the ten families ( $P > 0.10$  or greater in all ten cases) or between the O1MA ancestors at G250 and the O2MA lines at G400 (Supplementary Figure S2; MC FET,  $P > 0.51$ ). Consistent with many previous studies (Lynch 2007), the average mutation rate from a C or G to an A or T is significantly greater than the mutation rate from A or T to C or G ( $\mu_{C/G \rightarrow A/T} = 3.03 (\pm 0.18) \times 10^{-9}$  / gen;  $\mu_{A/T \rightarrow C/G} = 0.93 (\pm 0.05) \times 10^{-9}$  / gen). Extrapolating from these rates, the expected base composition of the *C. elegans* genome at mutational equilibrium is ~76.5% AT, greater than the actual AT fraction of ~64.5%. The ratio of transitions to transversions does not differ significantly between high fitness O2MA and low fitness O2MA lines ( $Ts/Tv_{High} = 0.72$ ,  $Ts/Tv_{Low} = 0.68$ ,  $t$ -test,  $P > 0.5$ ), nor does it differ between O2MA lines and O1MA ancestors ( $Ts/Tv_{O1MA} = 0.70$ ,  $Ts/Tv_{O2MA} = 0.74$ ,  $t$ -test,  $P > 0.8$ ).



|                                 | O1MA ancestor<br>(n=9) | O1MA<br>other (n=23) | O1MA<br>all (n=32)         | O2MA, High<br>(n=24)     | O2MA, Low<br>(n=24)      | O2MA, all<br>(n=48)        |
|---------------------------------|------------------------|----------------------|----------------------------|--------------------------|--------------------------|----------------------------|
| $\mu_{bs}$ ( $\times 10^9$ )    | 2.26 (0.12)            | 2.35 (0.11)          | 2.33 (0.08)                | 2.58 (0.11)              | 2.49 (0.32)              | 2.57 (0.11)                |
| $\mu_{INS}$ ( $\times 10^9$ )   | 0.26 (0.04)            | 0.25 (0.03)          | 0.26 <sup>x</sup> (0.02)   | 0.35 (0.03)              | 0.32 (0.04)              | 0.34 <sup>y</sup> (0.03)   |
| $\mu_{DEL}$ ( $\times 10^9$ )   | 0.42 (0.05)            | 0.39 (0.04)          | 0.40 (0.03)                | 0.59 <sup>a</sup> (0.07) | 0.41 <sup>b</sup> (0.04) | 0.50 (0.04)                |
| $\mu_{INDEL}$ ( $\times 10^9$ ) | 0.68 (0.06)            | 0.64 (0.05)          | 0.66 <sup>x</sup> (0.04)   | 0.95 <sup>a</sup> (0.06) | 0.73 <sup>b</sup> (0.05) | 0.84 <sup>y</sup> (0.05)   |
| $\mu_{Total}$ ( $\times 10^9$ ) | 2.94 (0.11)            | 2.99 (0.13)          | 2.98 <sup>x,*</sup> (0.10) | 3.52 (0.13)              | 3.21 (0.31)              | 3.37 <sup>y,*</sup> (0.16) |
| $\mu_{GENOME}$                  | 0.29                   | 0.30                 | 0.30                       | 0.35                     | 0.32                     | 0.34                       |

**Table 1.** Average mutation rates (standard errors in parentheses). All mutation rates are per-site, per-generation except  $\mu_{GENOME}$ . Abbreviations are:  $\mu_{bs}$ , base substitution mutation rate;  $\mu_{INS}$ , insertion rate;  $\mu_{DEL}$ , deletion rate;  $\mu_{INDEL}$ , indel rate;  $\mu_{Total}$ , total mutation rate;  $\mu_{GENOME}$ , haploid genome-wide mutation rate per-generation. O2MA rates are estimated by least squares means from the GLM. See Supplementary Appendix A1, Extended Methods, for details of the GLM. Within each row, values with different <sup>a,b</sup> superscripts are significantly different (P<0.05) within O1MA or O2MA groups; values with different <sup>x,y</sup> superscripts are significantly different (P<0.05) between O1MA and O2MA; \* P≈0.06.

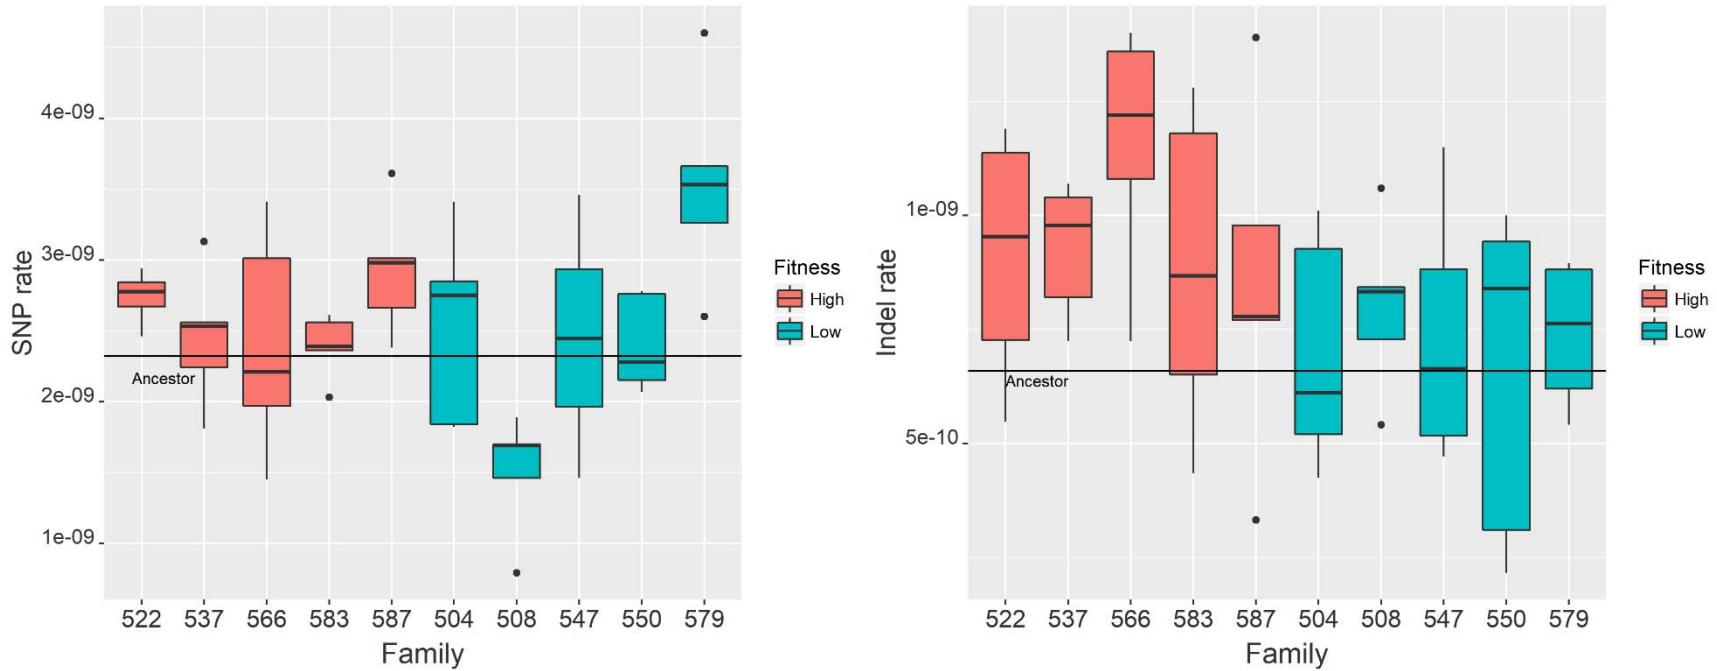

**Figure 2.** Distribution of base-substitution mutation rate,  $\mu_{bs}$ , among O2MA families. Families derived from high-fitness O1MA ancestors are in orange, families derived from low-fitness O1MA ancestors are in green. Families 522 and 547 contain four ancestors, the other families contain five O2MA lines. The horizontal line denotes the mutation rate of the nine O1MA ancestors. Points shown outside the box are beyond the 1.5 x inter-quartile range of the family whereas whiskers represent data points within that range. that the mutational process in the ten O1MA ancestors diverged by  $\sim 250$  generations of evolution under MA conditions, and the signal of the difference(s) was retained over the subsequent  $\sim 150$  generations of O2MA.

Inspection of the  $\mu_{bs}$  data reveals two potential outlying O2MA lines (Figure 2), one low fitness (O2MA line 508.34,  $\mu_{bs} = 0.78 \times 10^{-9}/\text{gen}$ ) and one high fitness (O2MA line 579.36,  $\mu_{bs} = 4.34 \times 10^{-9}/\text{gen}$ ). When those two lines are omitted from the analysis, the variance among O2MA lines is sufficiently explained by a single base-substitution rate (simulation  $P > 0.07$ ). However, O2MA lines derived from O1MA line 508 have the lowest base-substitution rate even with the extreme line omitted [ $\mu_{bs} = 1.49 (\pm 1.90) \times 10^{-9}/\text{gen}$  with line 508.34 included,  $1.68 (\pm 0.91) \times 10^{-9}/\text{gen}$  without line 508.34] and O2MA lines derived from O1MA line 579 have the highest base-substitution rate even with the extreme line omitted [ $\mu_{bs} = 3.53 (\pm 0.31) \times 10^{-9}/\text{gen}$  with line 579.36 included,  $3.26 (\pm 0.22) \times 10^{-9}/\text{gen}$  without line 579.36]. The random chance that the most extreme high line comes from the family whose other four members also have the highest average mutation rate (5/48) and that the most extreme low line comes from the family whose other four members also have the lowest average mutation rate (5/47) is approximately 1%. The most parsimonious explanation is that the two outlying O2MA lines are simply the most extreme manifestations of a biological process common to their respective O1MA progenitors rather than true outliers. The alternative is that the apparently extreme mutation rates are experimental artifacts, which we think is unlikely (see Extended Discussion in Supplementary Appendix A2).

*Fitness-dependence of the small indel rate.*

In contrast to the base-substitution mutation rate, which does not differ between O2MA lines derived from high fitness and low fitness O1MA lines, the O2MA short indel rate is significantly greater in the high fitness group ( $\mu_{INDEL} = 0.95 \pm 0.06 \times 10^{-9}/\text{generation}$ ) than in the low fitness group ( $\mu_{INDEL} = 0.73 \pm 0.50 \times 10^{-9}/\text{generation}$ ; GLM,  $F_{1,44.4} = 7.84$ ,  $P < 0.01$ ). The difference is primarily due to different rates of deletions ( $\mu_{DEL,High} = 0.59 \pm 0.07 \times 10^{-9}/\text{generation}$ ,  $\mu_{DEL,Low} = 0.41 \pm 0.04 \times 10^{-9}/\text{generation}$ ;  $F_{1,7.58} = 5.77$ ,  $P < 0.05$ ) rather than insertions ( $\mu_{INS,High} = 0.35 \pm 0.03 \times 10^{-9}/\text{generation}$ ,  $\mu_{INS,Low} = 0.32 \pm 0.04 \times 10^{-9}/\text{generation}$ ;  $F_{1,17.5} = 0.51$ ,  $P > 0.48$ ).

The variance in  $\mu_{INDEL}$  among O2MA lines within each fitness group is adequately explained by a single, fitness-specific indel rate (high-fitness, simulation  $P > 0.12$ ; low-fitness, simulation  $P > 0.2$ ). The distribution of indel lengths is given in Supplementary Figure S3.

The higher indel rate of high-fitness O2MA lines suggests that the indel rate of O1MA lines should be greater than the overall O2MA rate, given the higher fitness of the G0 ancestor. Interestingly, that is not what we observe. The overall O1MA indel rate, including all 32 O1MA lines, is significantly lower than high-fitness O2MA indel rate ( $\mu_{INDEL, O1MA} = 0.66 \pm 0.04 \times 10^{-9}$ /generation,  $\mu_{INDEL, O2MA\_High} = 0.95 \pm 0.06 \times 10^{-10}$ /generation; GLM,  $F_{1,41.7} = 15.61$ ,  $P < 0.0005$ ), but not significantly different from low fitness O2MA indel rate ( $\mu_{INDEL, O1MA} = 0.66 \pm 0.04 \times 10^{-9}$ /generation,  $\mu_{INDEL, O2MA\_Low} = 0.73 \pm 0.05 \times 10^{-9}$ /generation;  $F_{1,47.6} = 1.10$ ,  $P > 0.29$ ). The results do not change if only the nine O1MA ancestors are used to calculate the indel rate.

The O2MA insertion and deletion rates are uncorrelated ( $r_{INS,DEL} = 0.021$ ,  $P > 0.88$ ,  $n=48$ ), suggestive of different factors underlying the two types of mutations. The base-substitution rate is moderately positively correlated with the insertion rate ( $r_{bs,INS} = 0.32$ ,  $P < 0.03$ ,  $n=48$ ) but uncorrelated with the deletion rate ( $r_{bs,DEL} = -0.016$ ,  $P > 0.91$ ,  $n=48$ ).

There are two potential evolutionary factors that can explain the difference in the deletion rate between the different O2MA fitness groups. First, some element of the mutational process may differ, e.g., DNA repair. Alternatively, selection may differ in either strength or efficiency between the two treatments. In our MA protocol, differences in selection efficiency between lines can result from different frequencies of going to backup (see Methods). However, the mean effectively neutral selection coefficient ( $s_n = 1/4N_e$ ) is only slightly smaller in the low-fitness lines ( $\bar{s}_n = 0.228$ ) than in the high-fitness lines ( $\bar{s}_n = 0.239$ ). The slightly lower efficiency of selection in the high fitness group seems unlikely to account for the ~30% greater indel rate.

Alternatively, the strength of selection itself may be different between the two fitness groups, such that some mutations that are only mildly deleterious – and thus effectively neutral – in a high-fitness line are significantly more deleterious in a low-fitness line, i.e., epistasis is

synergistic (Gillespie 2004). In that case, a larger fraction of mutations in the low-fitness lines would exceed the threshold of effective neutrality and be removed by selection. The mutational effect analysis, as implemented in snpEff 4.1 (see Methods), reveals no significant difference in the frequency of potentially large-effect indels (20/303 among high-fitness O2MA lines, 10/186 among low-fitness lines, Fisher's Exact Test, two-tailed  $P > 0.70$ ) or SNPs (22/822 vs. 15/659, Yates' Chi-square, two-tailed  $P > 0.75$ ). Nor does the frequency of potentially large-effect mutations differ between the high and low-fitness G250 O1MA lines, between high-fitness O2MA and O1MA lines, or between low-fitness O2MA and O1MA lines ( $P > 0.12$  in all cases). The preceding analysis provides no information about mutations that did not fix. Nevertheless, synergistic epistasis, coupled with a slight overall increase in mutation rate, seems a more parsimonious explanation than different indel rates in high-fitness and low-fitness O2MA lines. Experimentally derived estimates of relative fitness (Matsuba et al. 2012) combined with estimates of the average number of mutations carried by high-fitness and low-fitness O2MA lines reinforce this conclusion (see Discussion).

#### *Recombination is positively associated with mutation*

Standing nucleotide diversity is almost always positively associated with recombination rate. There is strong reason to believe that natural selection (i.e., Hill-Robertson interference) has an important causal role in this pattern (Lynch 2007). However, with the important exception of humans, most of the data are derived from inferences drawn from comparisons with a reference class of genomic sites believed to be free from selective constraints (e.g., processed pseudogenes or four-fold degenerate sites) rather than directly from *de novo* mutations, and the extent to which recombination is mutagenic *per se* remains an open question. Two large studies of *de novo* mutations in humans report a significant univariate association between recombination rate and mutation rate (Michaelson et al. 2012; Francioli et al. 2015), although recombination appears to affect nucleotide diversity beyond its association with mutation. Two

cohort studies in bees (Yang et al. 2015; Liu et al. 2017) found a weak relationship between recombination and mutation, but the numbers of mutations were small and the inferences somewhat circumstantial. Conversely, Ness et al. (2015) found no association between recombination rate and mutation rate in the green alga *Chlamydomonas reinhardtii*, although the data on recombination rate in *C. reinhardtii* are sparser than for humans.

To investigate the relationship between recombination and mutation, we determined the association between  $\mu_{bs}$  estimated from the O2MA lines and recombination rate using weighted OLS regression, dividing each chromosome into the recombination rate bins reported by Rockman and Kruglyak (2009) and weighting each bin by its size in Mb. Recombination rate is nearly constant within each bin (see Figure 1 in Rockman and Kruglyak (2009)). Contrary to our previous report from a different (and smaller) subset of G250 O1MA lines (Denver et al. 2009), here we find a significant positive univariate association between recombination rate and  $\mu_{bs}$  (pseudo- $r^2 = 0.26$ ,  $P < 0.003$ , Supplementary Figure S4); presumably the discrepancy between this study and the previous report is due to the greater power afforded by the much greater number of mutations included in the present study (316 vs. 1828).

#### *The genomic correlates of mutability*

Many features of the genome and epigenome influence the mutational process. The effects of some such features are well-understood and seem to be relatively general to all living organisms (e.g., short tandem repeats, G:C vs. A:T, 5'-methyl-C), whereas others remain uncertain and/or appear to be taxon-specific. To more fully characterize the features of the *C. elegans* genome that are associated with the mutational process, we employed a logistic regression method, loosely following the approach of Michaelson et al. (2012) and Ness et al. (2015). Since the deletion rate differs significantly between the two O2MA fitness groups, we restricted the analysis to base-substitutions. Univariate logistic regression coefficients of the features included in the full multiple regression are shown in Figure 3.

To assess the predictive power of the mutability model, we randomly sampled half of the O2MA lines to train the model (24 lines; roughly 740 mutations) and tested the model on the remaining 24 O2MA lines. All mutant sites and 100,000 randomly chosen non-mutant sites were arbitrarily binned into 35 bins of uniform width, and the observed mutation rate for each mutability bin was plotted against expected mutability. Of the factors initially included in the multiple regression (see Methods), the best model includes only the 64 three-base motifs as a set of predictor variables (Figure 4a). Any combination of other predictors, with or without the three-base motif, results in a poorer fit (Figure 4b). The poorer fit presumably results from either overfitting, multicollinearity and/or the inability of the logistic regression model to accommodate non-linear relationships between predictor variables and mutation rate, even when tuned with high penalty ( $\lambda$ ) to drop predictor variables altogether (Lasso).

It is reassuring but not surprising that the model provides a good fit to the data from which it was generated. Of more interest is the relationship between mutability as predicted from MA data and the genetic variation observed in nature. We obtained publicly-available whole genome sequence data from 40 *C. elegans* wild isolates (Thompson et al. 2013) and identified SNPs using the same pipeline that we used to call putative mutations in the MA data. We identified ~537,000 SNPs by these criteria. Sites were categorized as variable or not variable, without regard to allele frequency.

Mutability was assessed as described previously, except in this analysis the model was trained on the full set of 1828 mutations. Figure 4c shows a plot of nucleotide diversity (quantified as  $\theta_w$ ; (Watterson 1975)) at non-coding sites (288,585 intron sites, and 122,272 intergenic sites) against predicted mutability. Averaged over all bins, mutability strongly predicts standing nucleotide diversity, although the variance is high at predicted high-mutability sites, presumably because the sample sizes are small.

Interestingly, a model including recombination rate and 1000-bp GC content in addition to three-base motif, trained with the same set of MA mutations, explains standing nucleotide

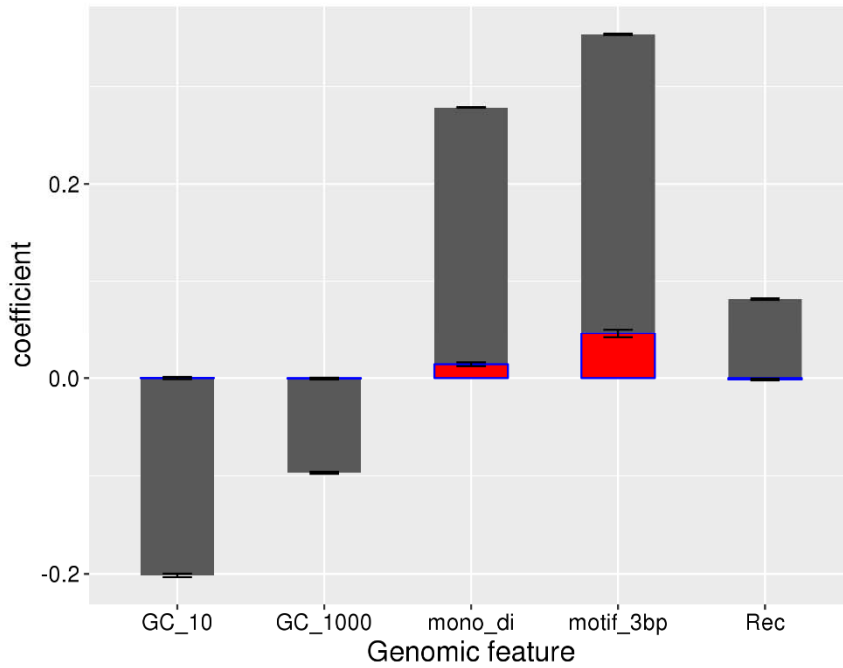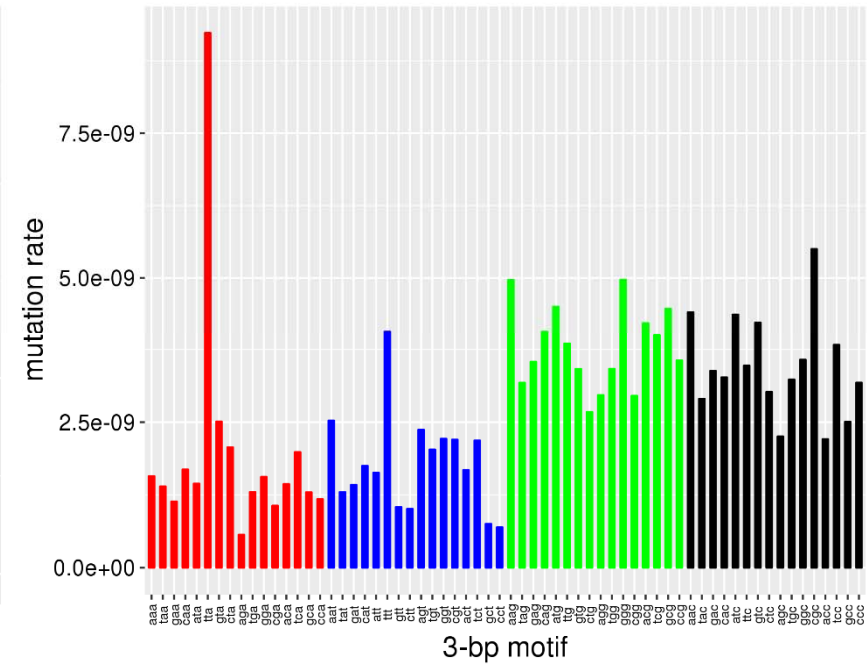

**Figure 3.** (a) Univariate logistic regression coefficients for different genomic features (gray bars). Overlapping red bars depict the null expectation from sampling variance with 1828 randomly selected genomic sites treated as mutations. Variable abbreviations are: GC\_10, 10 bp GC-content centered on the focal base; GC\_1000, 1 kb GC content; mono\_di, proximity to a mono or dinucleotide STR; motif\_3bp, three-base motif with the mutant base at the 3' end; Rec, local recombination rate. The method used to condense several predictors into one, for 3-base motif and mono-di STR, is described in the Methods. (b) Base-substitution mutation rate ( $\mu_{bs}$ ) of each 3-base motif, with mutations on the 3' end. Motifs are grouped by the mutant base.



diversity better than the model only including three-base motif (Figure 4d). The coefficients assigned to recombination rate and 1000-bp GC content are smaller than that of three-base motif (See Supplementary Table S3), which suggests the inherent mutability of those features is minor relative to that captured by the three-base motif. We discuss the potential causes and implications of this observation in the Discussion.

### *Short Tandem Repeats (STRs)*

Short tandem repeat loci ("microsatellites") can mutate orders of magnitude faster than other classes of loci, and potentially contribute a large fraction of the per-generation mutational variance. We previously estimated the haploid per-genome mutation rate of dinucleotide STR loci in the full set of O1MA lines to be ~0.12/generation (Phillips et al. 2009). That calculation accounts for variation in mutation rate among repeat motifs (e.g., AT vs. AG, etc.) and at least partly accounts for variation in mutation rate with repeat number, although there is substantial uncertainty that cannot be easily quantified. Seyfert et al. (2008) found no significant effect of repeat length (di, tri, or tetranucleotide repeat) on the rate of STR mutation in a different set of N2-strain MA lines. Denver et al. (2004) investigated the mutational process of mononucleotide repeats (= "homopolymers") in the same MA lines as Seyfert et al. and concluded that the (haploid) per-genome mononucleotide mutation rate is about 0.8/generation, more than twice the rate of all other classes of mutations combined. Mutational properties of STRs are summarized by repeat type in Supplementary Table S4 and Supplementary Figures S5 and S6.

Our findings qualitatively recapitulate those of the previous studies. First, G:C mononucleotides experience indel mutations at a tenfold greater rate than A:T mononucleotides, as observed by Denver et al. (2004). Second, indel mutation rate differs only about twofold between the three A:T containing dinucleotides (AC, AG, AT) and we detected no mutations at CG dinucleotides, both as observed by Phillips et al. (2009). The ratio of

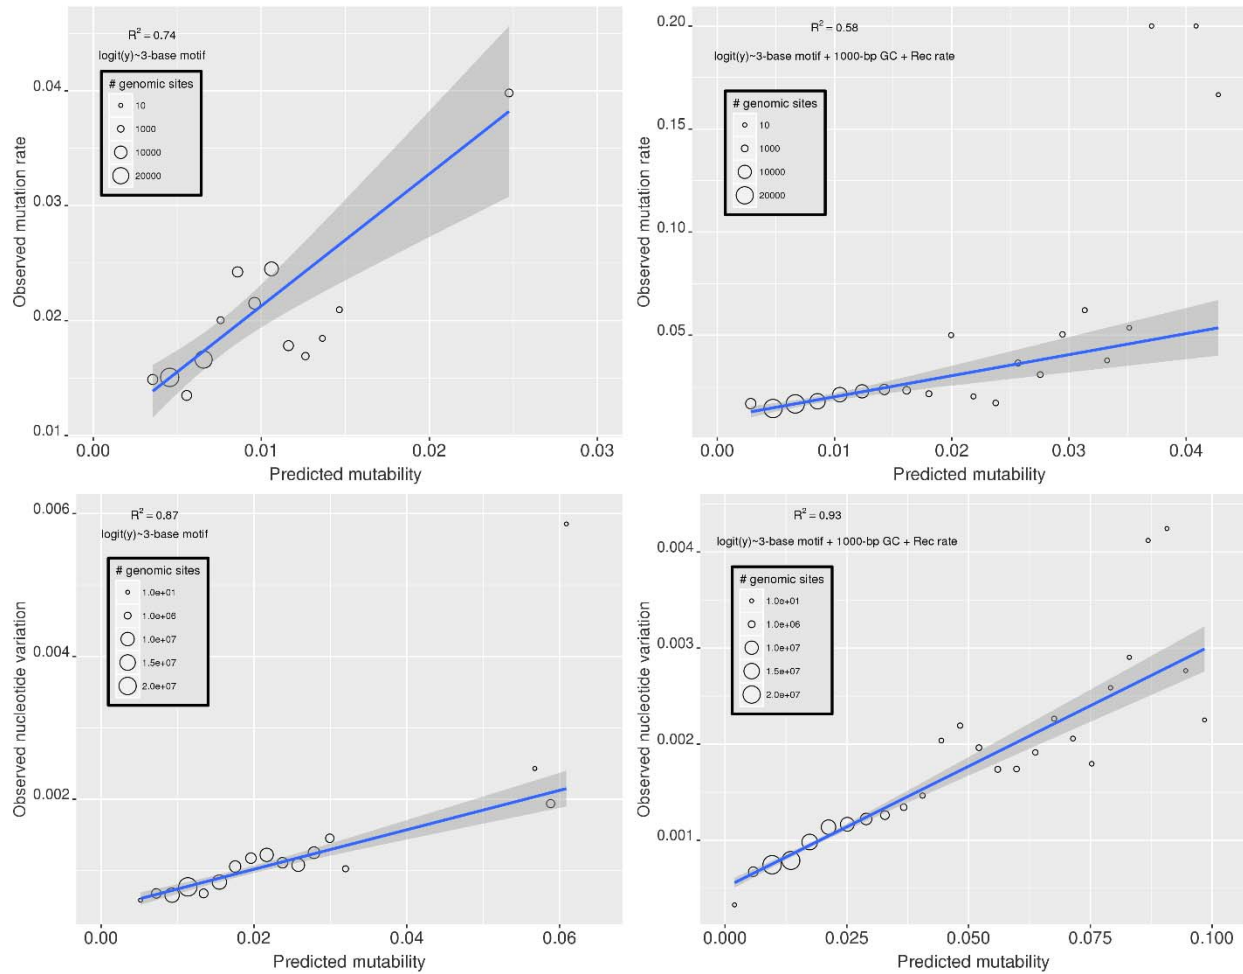

**Figure 4.** Top panels (a, b) depict the relationship between observed mutation rates and mutability across mutability bins ( $n=35$  bins). (a) The mutability model includes only the 3-base motif. (b) The mutability model includes 3-base motif, local recombination rate and 1 kb GC content. Bottom panels (c, d) depict the relationship between standing nucleotide variation, measured as Watterson's  $\theta$ , and predicted mutability. Mutability is calculated using the full complement of mutations ( $n=1828$ ), and mutability is predicted for the entire genome. (c) The mutability model includes only the 3-base motif. (d) The mutability model includes 1 kb GC content and local recombination rate.

mononucleotide deletions (251) to insertions (139) is not significantly different from the 16:14 ratio reported by Denver et al. (Yates' chi-square = 1.02, df = 1,  $P > 0.31$ ), and the ratio of dinucleotide deletions (10) to insertions (32) is nearly identical to the 8:28 ratio observed by Phillips et al. However, there are important quantitative differences between the findings of this study and the previously reported values. Even if we assume that our list of putative mutations contains no false positives, we calculate a genome-wide mononucleotide indel mutation rate of 0.056 mutations per haploid genome per generation. An analogous calculation with dinucleotide repeats, pooling across repeat types, gives a genome-wide dinucleotide mutation rate of ~ 0.003 indel mutations per haploid genome per generation. The mononucleotide rate is about 10% the rate estimated by Denver et al. (2004); the dinucleotide rate is about 5% of the estimate from Phillips et al. (2009). Potential causes of the source(s) of the discrepancies between this study and the previous studies are addressed in Supplementary Appendix S1.3.

#### *Copy Number Variants (CNVs)*

We called CNVs using a read-depth based method implemented in the CNV-seq software (Xie and Tammi 2009). The number of putative CNVs inferred is sensitive to the parameters of the analysis, but in no case did the mean number of putative CNVs differ between the high and low-fitness O2MA lines (Supplementary Table S5). Under the most liberal CNV-seq parameters (1.5X coverage threshold, 200 bp sliding windows), the average number of putative CNVs of length >1kb is approximately 0.8 per-genome per-generation, or about twice the number of all other types of mutations combined. The most conservative parameters (2X coverage threshold, 100 bp sliding windows) yield an estimated CNV mutation rate of about 0.07 per genome per generation, about 20% of the rate of all other types of mutations. To put those estimates in perspective, Lipinski et al. (2011) used competitive genome hybridization arrays (CGH) to estimate the CNV mutation rate in a different set of N2 strain MA lines. They reported a CNV mutation rate of about 0.006 per genome-generation, which they argued is probably an

underestimate. Given the uncertainty associated with the estimates, we did not attempt to confirm CNVs (e.g., with qPCR). We report the results as a cautionary note that, even with as "easy" a genome as *C. elegans* N2 strain MA lines, which are almost completely homozygous and have a well-characterized reference genome, estimates of CNVs are extremely sensitive to methodological details. We expect that the CNV problem will eventually be resolved with accurate long-read sequencing at high coverage (Chaisson et al. 2015; Tyson et al. 2018).

## Discussion

### *The Role of Fitness*

There is no evidence that the rate or molecular spectrum of base-substitution mutations in the N2 strain of *C. elegans* depends on the fitness of the starting genotype. In contrast, the short indel rate, especially the deletion rate, is fitness dependent, but not in the anticipated way: low-fitness genotypes have a significantly lower deletion rate than do high-fitness genotypes. This result differs from the finding in *Drosophila melanogaster* that low-fitness genotypes experience significantly greater rates of small deletions than do high-fitness genotypes, apparently because flies in poor physiological condition employ a different, more error-prone mechanism of double-strand break repair than do flies in good condition (Sharp and Agrawal 2016).

It is certainly possible that worms with high-fitness genotypes incur more short deletions than do worms with low-fitness genotypes and/or are worse at repairing them. Matsuba et al. (2012) found no significant difference in the per-generation decline in relative fitness ( $\Delta M$ ) between high-fitness and low-fitness O2MA families, but the point estimate of  $\Delta M$  was 67% greater in the low-fitness families. If we use the point estimates of the total mutation rates for O2MA lines derived from high-fitness and low-fitness O1MA ancestors and the estimates of the mutational decline in relative (non-competitive) fitness averaged over all O2MA lines (reported in Table 1 of Matsuba et al. (2012), recalculated based on the revised generation times reported in this study), the mean mutational effect on relative fitness of the low-fitness O2MA lines is

approximately -0.43% whereas that of the high-fitness O2MA lines is -0.27%. If we assume that only indels affect fitness, the mean effects on low-fitness and high-fitness O2MA lines are -2.1% and -0.9% respectively. We further suppose that the "dark matter" represented by the (assumed) missing fraction of indels in the low-fitness lines would amplify the difference in average selective effects.

Whether deleterious mutations interact synergistically *on average* has vexed generations of evolutionary biologists. In the abstract, existence of a robust system seems to imply redundancy of components, which in the context of a genetic system implies that epistasis must be synergistic on average (de Visser et al. 2003). Moreover, there are good reasons to believe that the continued existence of our own species implies that epistasis is synergistic, on average (Kondrashov 1995). Nevertheless, empirical evidence concerning the average epistatic effect of spontaneous deleterious mutations has been inconclusive (Halligan and Keightley 2009).

The simplest way to characterize the average epistatic effects of spontaneous mutations is to genotype and simultaneously assay for fitness a set of MA lines at two or more time points following the divergence from the common ancestor. A second-order MA experiment is simply a "force multiplier" in that regard. The data presented here represent some of the first direct evidence that spontaneous mutations interact synergistically, on average (see also Jasmin and Lenormand 2016).

#### *Variation in the Mutational Process*

The per-generation input of genetic variance for a trait, the mutational variance,  $V_M$ , ultimately governs the evolvability of the trait and is a fundamental parameter in evolutionary genetics (Lynch and Hill 1986).  $V_M$  can be estimated from MA data from the relationship  $V_M = \frac{V_L}{2t}$ , where  $V_L$  is the among-line component of variance and  $t$  is the number of generations of MA (Lynch and Walsh 1998).  $V_M$  is commonly standardized relative to the residual variance  $V_E$ , called the mutational heritability  $h_M^2 = \frac{V_M}{V_E}$ . Among O2MA families,  $V_L$  for  $\mu_{BS} = 0.196$ ,  $V_E = 0.316$ , and  $\bar{t} =$

143, so  $h_M^2 \approx 0.002/\text{generation}$ . To put that result in context,  $h_M^2$  for a wide variety of traits in disparate taxa averages about 0.001/generation (Houle et al. 1996), although  $h_M^2$  for some traits (notably gene expression) is consistently an order of magnitude less (e.g., Rifkin et al. 2005; Landry et al. 2007). That the mutation rate is evolvable is not surprising (we know it is), but the point estimate of  $h_M^2$  suggests that the mutational target for mutation rate is substantial. However, an estimate of a ratio of variances based on ten data points cannot be considered robust.

### *Mutability and Genetic Variation*

The observed positive univariate association between local recombination rate and mutation rate in this experiment is almost surely not due to Hill-Robertson interference. The expected time to fixation/loss of a new mutation is three generations (Keightley and Caballero 1997), and the average mutation rate (CNVs notwithstanding) is about one per genome every three generations. Thus, the opportunity for H-R interference in our experiment is very low, albeit not nonexistent. However, the causal factors underlying the relationship between local recombination rate and base-substitution mutation rate remain uncertain. The cause is not as simple as GC content (G:C being more mutable than A:T), because chromosome arms, which have higher recombination rates, are AT-rich. Most clearly, mononucleotide runs are both mutagenic and positively associated with local recombination rate.

Nonetheless, the increase in explanatory power of a mutability model that includes recombination rate and 1Kb GC content when predicting standing nucleotide variation begs an explanation. It seems unlikely that the alternative model captures the mutagenicity of recombination rate that is relevant to explaining standing nucleotide variation, but somehow poorly predicts the training set that generated it, i.e. MA mutations. There is greater standing genetic variation in regions of high recombination rate, so, all else equal, a model including a positive coefficient for recombination rate will better explain standing nucleotide diversity than the same model minus recombination rate. When we employ the same method used to

construct the mutability model from MA data to construct a "variability" model from standing variation, the coefficient for recombination rate increases fivefold, from 0.08 in models trained with MA mutations, to 0.35, reflecting the increased association between standing variation and recombination rate.

The mutability model does a good job of predicting standing nucleotide variation in natural isolates of *C. elegans*: sites that are more mutable are, on average, more variable (Figure 4c). Again, this is reassuring, but not surprising; the same relationship has been observed in *Chlamydomonas reinhardtii* (Ness et al. 2016) and humans (Francioli et al. 2015). One difference between *C. elegans* and many other organisms (e.g., humans) is that, in *C. elegans*, regions of low recombination (chromosome cores) are gene-rich rather than gene-poor, so H-R interference is more important in regions of low recombination both for inherent reasons and because the opportunity for selection is greater due to the larger target for deleterious mutations. One possibility is that, because chromosome arms are gene-poor, mutagenic features (e.g., specific motifs, such as mononucleotide runs) preferentially accumulate because their background effects on linked loci are less important. Perhaps paradoxically, the AT-richness of chromosome arms may be a signature of increased mutation rate, because C:G mutates to A:T more often than the reverse.

#### *Evolution of the mutation rate.*

The total mutation rate,  $\mu_{Total}$ , of the O2MA lines is about 13% greater than that of the O1MA lines (Table 1). Directional change in a trait under MA conditions ("mutational bias",  $\Delta M$ ) suggests that the trait is under ongoing directional selection in the opposite direction, analogous to the direction of phenotypic change upon inbreeding (Teotónio et al. 2017). This finding is consistent with the "drift barrier" hypothesis of mutation rate evolution, which posits that directional selection to reduce the mutation rate is opposed by a weak mutational bias (Lynch 2008). It is not consistent with the mutation rate being at an optimum established by a "cost of fidelity", wherein direct selection to reduce the input of deleterious mutations is counterbalanced

by indirect selection to reduce the fitness cost of genome surveillance (Kimura 1967). If the mutation rate is at an optimum imposed by countervailing components of selection, the overall fitness function will be stabilizing. Provided that the fitness function is approximately symmetrical around the optimum, the expectation is that the among-line variance in the trait will increase but that the overall trait mean will not change. We emphasize that these findings do not imply that there is no cost of fidelity, just that the mutation rate in *C. elegans* does not appear to be at a global optimum.

The ~13% increase in mutation rate over the course of ~250 generations amounts to a per-generation change  $\Delta M \approx 0.0005$ , compared to a per-generation decrease in competitive fitness of  $\approx 0.001$  in the same lines (Yeh et al. 2018). It is difficult to believe that direct selection to decrease mutation rate is half as strong as selection on competitive fitness. The most logical conclusion is that mutations that increase mutation rate have deleterious pleiotropic effects on fitness. However, this conclusion seems at odds with the failure to observe a main effect of fitness in the O2MA lines. In principle, the discrepancy could be resolved by determining the mutational correlation of mutation rate with fitness. The sample sizes necessary to answer that question in multicellular organisms are currently prohibitive, but it may be practical in a microbial system.

## **Methods and Materials**

*Mutation Accumulation Protocol.* A schematic depiction of the experimental design is presented in Figure 1. Details of the first-order MA protocol and fitness assays are reported in Baer et al. (2005); details of the second-order MA protocol are reported in Matsuba et al. (2012) and summarized in the Extended Methods, Supplementary Appendix A1.1.

*Genome sequencing and estimation of mutation rates.* Five O2MA lines from the ten O2MA families and 35 O1MA lines, including the ten O2MA progenitors, were sequenced at an average of ~25X coverage depth. Sequencing was done using Illumina technology with 100 bp paired-end reads. Protocols for DNA extraction and construction of sequencing libraries are



given in Supplementary Appendix A1.2; details of preliminary processing of raw sequence data are given in Supplementary Appendix A1.3. The quality of sequence from two O2MA lines and one O1MA line was poor and these samples were omitted from further analyses, leaving 48 O2MA line and nine of the ten O2MA progenitors.

Variants were called using GATK software (McKenna et al. 2010) with a minimum coverage threshold of  $>10X$ . Variants were identified as putative mutations if (1) the variant was identified as homozygous, and (2) it was present in one and only one O2MA line. Criterion (1) means that any mutations that occurred in the last few generations of second-order MA that were still segregating and/or occurred during population expansion for DNA extraction were ignored. Because the O1MA progenitor was at mutation-drift equilibrium (Lynch and Hill 1986), the segregating variation is expected to be the same in the O1MA progenitor and the O2MA line, so ignoring heterozygotes results in an unbiased estimate of mutation rate. Criterion (2) reduces the probability of mistakenly identifying a variant segregating at low frequency in the expanded population of the O1MA progenitor as a new mutation. Two pairs of O1MA lines shared multiple variants and were inferred to have experienced contamination at some point during the MA phase; one line from each pair was arbitrarily omitted from subsequent analyses (see Extended Discussion, Supplementary Appendix A2.1).

The mutation rate (per-site, per-generation)  $\mu$  of each O2MA line was calculated as  $m/nt$  where  $m$  is the number of mutations,  $n$  is the number of nucleotide sites observed and  $t$  is the number of generations of MA (Denver et al. 2009). The average mutation rate of each O1MA progenitor was calculated as the unweighted mean of the O2MA lines in that family.

We applied three additional variant-calling strategies, one with a more stringent set of criteria which we refer to as the "trimmed genome" and two with more liberal criteria, which we refer to as the "lenient genome" and "STR-relaxed", respectively. We also explored several alternative GATK filters. Details of the alternative GATK filters are given in Supplementary

Appendix A1.3; justification and details of of the additional variant-calling strategies are given in Supplementary Appendix A1.4.

*Mutation Confirmation* - From each of the 48 O2MA lines, we randomly chose one putative base-substitution and one putative indel mutation for confirmation by Sanger sequencing. Details of the confirmation protocol are given in Supplementary Appendix A1.5. We confirmed 43/48 putative base-substitutions (zero false positives, five failures) and 36/48 putative indels (zero false positives, 12 failures), consistent with a false positive rate below 2.5% based on the upper 95% Poisson confidence limit. The number of failures did not differ significantly between base-substitutions and indels (Fisher's exact test, two-tailed  $P > 0.1$ ).

#### *Data Analysis*

*i) Variation among O1MA and O2MA lines* - The simplest hypothesis regarding the mutational process is that it remained constant over the course of the experiment subsequent to the divergence of the O1MA lines from the common G0 ancestor. To test the hypothesis that a uniform mutation rate sufficiently explains variation among MA lines, we simulated the evolutionary process of 48 O2MA lines with a uniform base-substitution mutation rate equal to the unweighted mean base-substitution mutation rate of the 48 O2MA lines, accounting for the number of callable sites (Supplementary Table S2) and the number of generations of second-order MA of each line (Supplementary Table S1). The simulation was repeated 100,000 times, and the observed variance in mutation rate among the 48 O2MA lines was compared to the distribution of simulated variances (Supplementary Figure S1). An analogous simulation was done for the 34 O1MA lines. Details of the simulation and code are provided in Supplementary Appendix A3.1.

To test for effects of fitness on mutation rate and to partition the variance in mutation rate into within and among-group components, we consider the mutation rate itself as a continuously-distributed dependent variable in a general linear model (GLM). Details of the GLM analyses are given in Supplementary Appendix A1.6.

It is possible that the distribution of mutation types – the mutational spectrum - differs among groups even if the overall mutation rate does not (Long et al. 2016), or if none of the type-specific mutation rates achieves statistical significance. Spectra were compared among groups by Fisher's Exact Test using Monte Carlo sampling as implemented in the FREQ procedure of SAS v. 9.4.

*ii) Mutability* – Many factors potentially influence the probability that a site will mutate. Some of these factors can be unambiguously characterized from pooled genomic DNA from a population of multicellular organisms (local sequence motif, base composition at various scales, local recombination rate), whereas other factors that potentially influence heritable mutation are only relevant in the context of the germline or its embryonic precursors (e.g., chromatin state, nucleosome occupancy, expression level). To elucidate the relationship between the various genomic properties of a given site and the probability that a mutation occurs at that site, we employed a logistic regression model in which the log odds-ratio that a mutation occurs at a given site (success=mutation) is modeled as the sum of a set of linear predictor input variables (Michaelson et al. 2012; Ness et al. 2016). We initially included as independent variables the three-base motif with the focal nucleotide at the 3' end and at the 5' end (these need not be redundant if the probability that a sequencing read is included is not identical for the two strands), the five-base motif with the focal nucleotide in the center, local recombination rate (see Results for details), presence or absence of the focal site in the vicinity of a (mono/di)nucleotide run ( $\pm 2$  bp), and the 11-base and 1001-base GC-content, centered on the focal site. For cross-validation, we trained our models using half of our O2MA lines (n=24), including all base substitutions and 100,000 randomly chosen non-mutant sites, and tested the predictions on the remaining 24 O2MA lines. Following model selection, we trained the model using all the ancestral O1MA and O2MA mutations (n=1828). Including only SNPs from the O2MA lines (n=1481) had no qualitative effect on the results.

Logistic regression was performed using the GLMnet package in R (Friedman et al. 2010). The two model parameters are the tuning penalty  $\lambda$  and the ridge/lasso penalty  $\alpha$ . As  $\alpha \rightarrow 0$  (ridge), the model tends to shrink the coefficients of correlated predictor variables toward each other without dropping any of the predictor variables. As  $\alpha \rightarrow 1$  (lasso), when predictor variables are correlated the model chooses one and discards the other(s). The tuning parameter  $\lambda$  controls the overall strength of the penalty. For all the models we tested,  $\lambda$  was chosen by the package's built-in cross validation function ("lambda-min"). The fit of our models remain largely unchanged by the selection of  $\alpha$ , with the exception of instances where  $\alpha \rightarrow 0$  (ridge). For values of  $\alpha$  sufficiently close to 0, we observed twice the slope (bias, or regression coefficient; expected value = 1) expected when the observed mutation rate is regressed against the predicted mutation rate. All results presented here used  $\alpha=0.05$ .

Models including short tandem repeats (STRs), five base motif and/or 10bp GC content together with three-base motif fit poorly. The poor fit could be due either to overfitting, multicollinearity and/or a non-linear relationship between a predictor variable and mutability. Moreover, models that included STRs as the only predictors fit reasonably well in terms of calibration of the model, but suffer from poorer predictive discrimination, as they lack any discrimination in the non-STR region of the genome (~97% of the genome). The final set of models tested include only the three-base motif with the focal nucleotide at the 3' end, 1Kb GC content and local recombination rate. For each set of input predictor variables and  $\alpha$ , the dataset was resampled 200 times, with a different randomly chosen set of 100,000 non-mutant sites, and divided into halves, the training set and the test set. The training set consisted of half the O2MA lines, and the test set consisted of the other half. For each data partition, the model was trained and the fit to the test set was assessed by the fraction of the variance explained by the linear regression of the observed (test) value on the predicted (training) value ( $R^2$ ), the regression coefficient (bias, expected value = 1), and the area under the ROC curve (AUC, or c-statistic) for predictive discrimination (varies between 0 and 1). For each set of  $\alpha$  and input

variables, we generated a distribution of 200  $R^2$  values, bias values and AUC values, and retained model(s) that maximized  $R^2$ , and AUC while kept the regression coefficient to as close to one as possible. Code and example files are provided in Supplementary Appendix A3.2.

Although mutability potentially varies between 0 and 1, the highest mutability observed rarely exceeded 0.2, as average mutability is the fraction of mutant sites as compared to the total number of sites. During cross-validation, we trained the model on slightly under half of the total mutations (~740 mutants; half of all O2MA mutants, and none of the O1MA mutants), and 100,000 randomly selected sites, yielding the expected value of mutability to be ~0.007 ( $740/(100000+740)$ ). Following model selection, to assess the relationship between standing genetic variation and mutability, we recalculated mutability using all 1828 mutations. Expected mutability calculated from the full data set is ~0.017 ( $1828/(100000+1828)$ ).

To assess the relative contribution to mutability of different genomic features, we took a slightly different approach. It is not possible to condense 64 3-base motifs into a single predictor in a standard logistic regression framework. Instead, we trained a logistic regression model using only the 3-base motif, and used the predictions made from this model as predictors in a second logistic regression, which yields a single coefficient for 3-base motif. We then selected 1828 random sites from the genome, treated them as mutations, and repeated the process 100 times to obtain the null distribution for these coefficients.

*iii) Copy Number Variants* - We called putative copy-number variants (CNVs) using a read-depth (RD) based approach as implemented in the CNV-Seq software (Xie and Tammi 2009). Read-depth outliers in an O2MA line are identified relative to its O1MA ancestor. We employed a sliding window approach, in which read-depth in a given window in the focal O2MA sample is compared to read-depth in the reference (O1MA ancestor), by taking the ratio of total reads falling in that window, normalized by the average read-depth for that chromosome in that sample. We used two different signal thresholds (1.5x/2x) for calling duplications or deletions, and two different sliding window sizes (100 bp/200 bp). The minimum detectable size of a CNV

is 1kb in all cases. A putative CNV is called only when all sliding windows covering an interval meet the signal threshold. The smaller the window, the more conservative the test, because more consecutive windows must meet the signal criterion. Similarly, the greater the signal threshold, the more conservative the criterion. As with other types of variants, only putative CNVs unique to a single O2MA line are considered potential mutations. For reasons which we elaborate in the Results, we did not attempt to validate CNVs.

*iv) Predicted Mutational Effects* – Selection in a MA experiment is minimal, but it is not absent. Mutations with fitness effects  $s > 1/4N_e$  will be subject to purifying selection ( $N_e \approx 1$  in this experiment), and we expect that different types of mutations will have different probabilities of surpassing the threshold of effective neutrality. To broadly categorize the distribution of predicted mutational effects, we used the publicly available software snpEff 4.1 (Cingolani et al. 2012) to annotate variants with respect to a set of characteristics potentially related to fitness ([http://snpeff.sourceforge.net/VCFannotationformat\\_v1.0.pdf](http://snpeff.sourceforge.net/VCFannotationformat_v1.0.pdf)). The snpEff software uses gene lists (gff/gff3) from the WS234 build of the *C. elegans* genome to assign a putative effect score of high, moderate, or low based on these characteristics, where a "high" effect variant is most likely to have a deleterious effect on fitness. Each variant can have multiple annotations due to different alleles and/or different splice variants; we included only the largest potential effect of each variant. Effects were parsed using custom AWK scripts and categorized as having low, medium, or high maximum impact.

## **Acknowledgments**

We thank Tim Crombie, Joanna Dembek, Joanna Joyner-Matos, Gigi Ostrow, Asher Shoucair and the many undergraduate students who worked over the years to maintain and propagate the MA lines. We thank Rob Ness and Jonathan Sebat for graciously explaining some details of the analyses in their papers, and Mike Miyamoto for his helpful comments. Support was

provided by NSF grant DEB-0717167 to CFB and NIH grants R01GM072639 to CFB and D. R.

Denver and R01GM107227 to CFB and E. C. Andersen.

## Literature Cited

- Agrawal AF. 2002. Genetic loads under fitness-dependent mutation rates. *Journal of Evolutionary Biology* **15**(6): 1004-1010.
- Agrawal AF, Wang AD. 2008. Increased transmission of mutations by low condition females: evidence for condition-dependent DNA repair. *PLoS Biology* **6**: 389-395.
- Ávila V, Chavarrias D, Sanchez E, Manrique A, Lopez-Fanjul C, Garcia-Dorado A. 2006. Increase of the spontaneous mutation rate in a long-term experiment with *Drosophila melanogaster*. *Genetics* **173**(1): 267-277.
- Baer CF, Shaw F, Steding C, Baumgartner M, Hawkins A, Houppert A, Mason N, Reed M, Simonelic K, Woodard W et al. 2005. Comparative evolutionary genetics of spontaneous mutations affecting fitness in rhabditid nematodes. *Proceedings of the National Academy of Sciences of the United States of America* **102**(16): 5785-5790.
- Bjedov I, Tenailon O, Gerard B, Souza V, Denamur E, Radman M, Taddei F, Matic I. 2003. Stress-induced mutagenesis in bacteria. *Science* **300**(5624): 1404-1409.
- Cairns J, Foster PL. 1991. Adaptive reversion of a frameshift mutation in *Escherichia coli*. *Genetics* **128**(4): 695-701.
- Chaisson MJP, Huddleston J, Dennis MY, Sudmant PH, Malig M, Hormozdiari F, Antonacci F, Surti U, Sandstrom R, Boitano M et al. 2015. Resolving the complexity of the human genome using single-molecule sequencing. *Nature* **517**(7536): 608-U163.
- Cingolani P, Platts A, Wang LL, Coon M, Nguyen T, Wang L, Land SJ, Lu XY, Ruden DM. 2012. A program for annotating and predicting the effects of single nucleotide polymorphisms, SnpEff: SNPs in the genome of *Drosophila melanogaster* strain w(1118); iso-2; iso-3. *Fly* **6**(2): 80-92.
- Conrad DF, Keebler JEM, DePristo MA, Lindsay SJ, Zhang YJ, Casals F, Idaghdour Y, Hartl CL, Torroja C, Garimella KV et al. 2011. Variation in genome-wide mutation rates within and between human families. *Nature Genetics* **43**(7): 712-U137.
- de Visser J, Hermisson J, Wagner GP, Meyers LA, Bagheri HC, Blanchard JL, Chao L, Cheverud JM, Elena SF, Fontana W et al. 2003. Perspective: Evolution and detection of genetic robustness. *Evolution* **57**(9): 1959-1972.
- Denamur E, Bonacorsi S, Giraud A, Duriez P, Hilali F, Amorin C, Bingen E, Andremont A, Picard B, Taddei F et al. 2002. High frequency of mutator strains among human uropathogenic *Escherichia coli* isolates. *J Bacteriol* **184**(2): 605-609.
- Denamur E, Matic I. 2006. Evolution of mutation rates in bacteria. *Molecular Microbiology* **60**(4): 820-827.
- Denver DR, Dolan PC, Wilhelm LJ, Sung W, Lucas-Lledo JI, Howe DK, Lewis SC, Okamoto K, Thomas WK, Lynch M et al. 2009. A genome-wide view of *Caenorhabditis elegans* base-substitution mutation processes. *Proceedings of the National Academy of Sciences of the United States of America* **106**(38): 16310-16314.
- Denver DR, Morris K, Kewalramani A, Harris KE, Chow A, Estes S, Lynch M, Thomas WK. 2004. Abundance, distribution, and mutation rates of homopolymeric nucleotide runs in the genome of *Caenorhabditis elegans*. *Journal of Molecular Evolution* **58**(5): 584-595.
- Dickinson WJ. 2008. Synergistic fitness interactions and a high frequency of beneficial changes among mutations accumulated under relaxed selection in *Saccharomyces cerevisiae*. *Genetics* **178**(3): 1571-1578.
- Drake JW, Charlesworth B, Charlesworth D, Crow JF. 1998. Rates of spontaneous mutation. *Genetics* **148**(4): 1667-1686.
- Fisher RA. 1930. *The Genetical Theory of Natural Selection*. Clarendon Press, Oxford.



- Foster PL. 1999. Mechanisms of stationary phase mutation: A decade of adaptive mutation. *Annual Review of Genetics* **33**: 57-88.
- Francioli LC, Polak PP, Koren A, Menelaou A, Chun S, Renkens I, van Duijn CM, Swertz M, Wijmenga C, van Ommen G et al. 2015. Genome-wide patterns and properties of de novo mutations in humans. *Nature Genetics* **47**(7): 822-+.
- Friedman J, Hastie T, Tibshirani R. 2010. Regularization Paths for Generalized Linear Models via Coordinate Descent. *Journal of Statistical Software* **33**(1): 1-22.
- Gillespie JH. 2004. *Population Genetics: A Concise Guide*. Johns Hopkins University Press, Baltimore, MD.
- Halligan DL, Keightley PD. 2009. Spontaneous mutation accumulation studies in evolutionary genetics. *Annual Review of Ecology Evolution and Systematics* **40**: 151-172.
- Houle D, Morikawa B, Lynch M. 1996. Comparing mutational variabilities. *Genetics* **143**(3): 1467-1483.
- Jasmin JN, Lenormand T. 2016. Accelerating Mutational Load Is Not Due to Synergistic Epistasis or Mutator Alleles in Mutation Accumulation Lines of Yeast. *Genetics* **202**(2): 751-+.
- Keightley PD, Caballero A. 1997. Genomic mutation rates for lifetime reproductive output and lifespan in *Caenorhabditis elegans*. *Proceedings of the National Academy of Sciences of the United States of America* **94**(8): 3823-3827.
- Kimura M. 1967. On evolutionary adjustment of spontaneous mutation rates. *Genetical Research* **9**(1): 23-27.
- Kondrashov AS. 1995. Contamination of the genome by very slightly deleterious mutations: why have we not died 100 times over? *Journal of Theoretical Biology* **175**(4): 583-594.
- Landry CR, Lemos B, Rifkin SA, Dickinson WJ, Hartl DL. 2007. Genetic properties influencing the evolvability of gene expression. *Science* **317**(5834): 118-121.
- Lipinski KJ, Farslow JC, Fitzpatrick KA, Lynch M, Katju V, Bergthorsson U. 2011. High spontaneous rate of gene duplication in *Caenorhabditis elegans*. *Current Biology* **21**(4): 1-5.
- Liu HX, Jia YX, Sun XG, Tian DC, Hurst LD, Yang SH. 2017. Direct Determination of the Mutation Rate in the Bumblebee Reveals Evidence for Weak Recombination-Associated Mutation and an Approximate Rate Constancy in Insects. *Molecular Biology and Evolution* **34**(1): 119-130.
- Long HG, Behringer MG, Williams E, Te R, Lynch M. 2016. Similar Mutation Rates but Highly Diverse Mutation Spectra in Ascomycete and Basidiomycete Yeasts. *Genome Biology and Evolution* **8**(12): 3815-3821.
- Lynch M. 2007. *The Origins of Genome Architecture*. Sinauer Associates, Inc., Sunderland, MA.
- . 2008. The cellular, developmental, and population-genetic determinants of mutation-rate evolution. *Genetics* **180**(180): 933-943.
- Lynch M, Ackerman MS, Gout JF, Long H, Sung W, Thomas WK, Foster PL. 2016. Genetic drift, selection and the evolution of the mutation rate. *Nature Reviews Genetics* **17**(11): 704-714.
- Lynch M, Hill WG. 1986. Phenotypic evolution by neutral mutation. *Evolution* **40**(5): 915-935.
- Lynch M, Walsh B. 1998. *Genetics and Analysis of Quantitative Traits*. Sinauer, Sunderland, MA.
- Matic I, Radman M, Taddei F, Picard B, Doit C, Bingen E, Denamur E, Elion J. 1997. Highly variable mutation rates in commensal and pathogenic *Escherichia coli*. *Science* **277**(5333): 1833-1834.
- Matsuba C, Lewis S, Ostrow DG, Salomon MP, Sylvestre L, Ungvari-Martin J, Baer CF. 2012. Invariance (?) of mutational parameters for relative fitness over 400 generations of mutation accumulation in *Caenorhabditis elegans*. *G3|Genes, Genomes, Genetics* **2**: 1497-1503.
- McKenna A, Hanna M, Banks E, Sivachenko A, Cibulskis K, Kernytsky A, Garimella K, Altshuler D, Gabriel S, Daly M et al. 2010. The Genome Analysis Toolkit: A MapReduce framework for analyzing next-generation DNA sequencing data. *Genome Research* **20**(9): 1297-1303.
- Michaelson JJ, Shi YJ, Gujral M, Zheng HC, Malhotra D, Jin X, Jian MH, Liu GM, Greer D, Bhandari A et al. 2012. Whole-genome sequencing in autism identifies hot spots for *de novo* germline mutation. *Cell* **151**(7): 1431-1442.

- Ness RW, Kraemer SA, Colegrave N, Keightley PD. 2016. Direct Estimate of the Spontaneous Mutation Rate Uncovers the Effects of Drift and Recombination in the *Chlamydomonas reinhardtii* Plastid Genome. *Molecular Biology and Evolution* **33**(3): 800-808.
- Ness RW, Morgan AD, Vasanthakrishnan RB, Colegrave N, Keightley PD. 2015. Extensive de novo mutation rate variation between individuals and across the genome of *Chlamydomonas reinhardtii*. *Genome Research* **25**(11): 1739-1749.
- Ogur M, Ogur S, Stjohn R. 1960. Temperature dependence of the spontaneous mutation rate to respiration deficiency in *Saccharomyces*. *Genetics* **45**(2): 189-194.
- Phillips N, Salomon M, Custer A, Ostrow D, Baer CF. 2009. Spontaneous mutational and standing genetic (co)variation at dinucleotide microsatellites in *Caenorhabditis briggsae* and *Caenorhabditis elegans*. *Molecular Biology and Evolution* **26**(3): 659-669.
- Rifkin SA, Houle D, Kim J, White KP. 2005. A mutation accumulation assay reveals a broad capacity for rapid evolution of gene expression. *Nature* **438**(7065): 220-223.
- Rockman MV, Kruglyak L. 2009. Recombinational Landscape and Population Genomics of *Caenorhabditis elegans*. *PLoS Genetics* **5**(3).
- Schrider DR, Houle D, Lynch M, Hahn MW. 2013. Rates and Genomic Consequences of Spontaneous Mutational Events in *Drosophila melanogaster*. *Genetics* **194**: 937-954.
- Seyfert AL, Cristescu MEA, Frisse L, Schaack S, Thomas WK, Lynch M. 2008. The rate and spectrum of microsatellite mutation in *Caenorhabditis elegans* and *Daphnia pulex*. *Genetics* **178**(4): 2113-2121.
- Sharp NP, Agrawal AF. 2012. Evidence for elevated mutation rates in low-quality genotypes. *Proceedings of the National Academy of Sciences of the United States of America* **109**(16): 6142-6146.
- . 2016. Low genetic quality alters key dimensions of the mutational spectrum. *PLoS Biology* **14**(3).
- Shaw FH, Baer CF. 2011. Evolutionary consequences of fitness-dependent mutation rate in finite populations. *Journal of Evolutionary Biology* **24**: 1677-1684.
- Sturtevant AH. 1937. Essays on evolution. 1. On the effects of selection on mutation rate. *Quarterly Review of Biology* **12**: 467-477.
- Teotónio H, Estes S, Phillips PC, Baer CF. 2017. Experimental Evolution with *Caenorhabditis Nematodes*. *Genetics* **206**(2): 691-716.
- Thompson O, Edgley M, Strasbourger P, Flibotte S, Ewing B, Adair R, Au V, Chaudhry I, Fernando L, Hutter H et al. 2013. The million mutation project: A new approach to genetics in *Caenorhabditis elegans*. *Genome Research* **23**(10): 1749-1762.
- Turrientes MC, Baquero F, Levin BR, Martinez JL, Ripoll A, Gonzalez-Alba JM, Tobes R, Manrique M, Baquero MR, Rodriguez-Dominguez MJ et al. 2013. Normal Mutation Rate Variants Arise in a Mutator (Mut S) *Escherichia coli* Population. *PLoS One* **8**(9).
- Tyson JR, O'Neil NJ, Jain M, Olsen HE, Hieter P, Snutch TP. 2018. MinION-based long-read sequencing and assembly extends the *Caenorhabditis elegans* reference genome. *Genome Research* **28**(2): 266-274.
- Watterson GA. 1975. Number of segregating sites in genetic models without recombination. *Theoretical Population Biology* **7**(2): 256-276.
- Xie C, Tammi MT. 2009. CNV-seq, a new method to detect copy number variation using high-throughput sequencing. *Bmc Bioinformatics* **10**.
- Yang SH, Wang L, Huang J, Zhang XH, Yuan Y, Chen JQ, Hurst LD, Tian DC. 2015. Parent-progeny sequencing indicates higher mutation rates in heterozygotes. *Nature* **523**(7561): 463-U187.
- Yeh S-D, Saxena AS, Crombie TA, Feistel D, Johnson LM, Lam I, Lam J, Saber S, Baer CF. 2018. The mutational decay of male-male and hermaphrodite-hermaphrodite competitive fitness in the androdioecious nematode *C. elegans*. *Heredity* **120**(1): 1-12.
